# Supplementary material for: A nano-magnetic electrochemical sensor for the determination of mood disorder related substances
Source: Royal Society of Chemistry journal article supplement (doi:10.1039/c8ra01857j), 2018-01-01
Supplement: c8ra01857j1.pdf [file c8ra01857j1.pdf]

## SUPPORTING INFORMATION

### A nano-magnetic electrochemical sensor for the determination of mood disorder substances

Fernando H Cincotto<sup>a\*</sup>, Daniel A. S. Carvalho<sup>a</sup>, Thiago C Canevari<sup>b</sup>, Henrique E. Toma<sup>c</sup>, Orlando Fatibello-Filho<sup>a</sup>, Fernando C. Moraes<sup>a\*</sup>

<sup>a</sup>Chemistry Department, Federal University of São Carlos, 13565-905, São Carlos, SP, Brazil

<sup>b</sup>Engineering School, Mackenzie Presbyterian University, 01302-907, São Paulo, SP, Brazil

<sup>c</sup>Institute of Chemistry, University of São Paulo, 05508-000, São Paulo, SP, Brazil;

\*Corresponding authors: [fernandocincotto@gmail.com](mailto:fernandocincotto@gmail.com), [fc Moraes@ufscar.br](mailto:fc Moraes@ufscar.br)

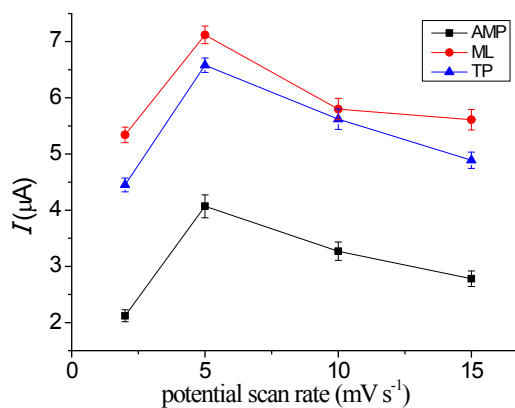

Fig. 1S. Influence of the potential scan rate of GCE/MagNPs/Cdots on the DPV signal of the composite electrode toward 10.0  $\mu\text{mol L}^{-1}$  mix solution of AMP, ML and TP in 0.1  $\text{mol L}^{-1}$  BR-buffer pH 3.0. Modulation amplitude = 50 mV, step potential = 2 mV.

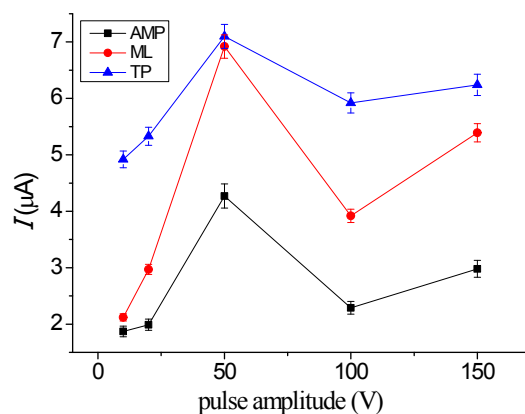

Fig. 2S. Influence of the pulse amplitude of GCE/MagNPs/Cdots on the DPV signal of the composite electrode toward  $10.0 \mu\text{mol L}^{-1}$  mix solution of AMP, ML and TP in  $0.1 \text{ mol L}^{-1}$  BR-buffer pH 3.0. Scan rate =  $5 \text{ mV s}^{-1}$ , step potential =  $2 \text{ mV}$ .

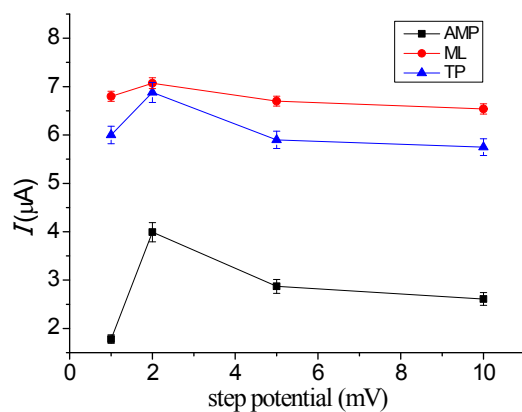

Fig. 3S. Influence of the step potential of GCE/MagNPs/Cdots on the DPV signal of the composite electrode toward  $10.0 \mu\text{mol L}^{-1}$  mix solution of AMP, ML and TP in  $0.1 \text{ mol L}^{-1}$  BR-buffer pH 3.0. Scan rate =  $5 \text{ mV s}^{-1}$ , Modulation amplitude =  $50 \text{ mV}$ .

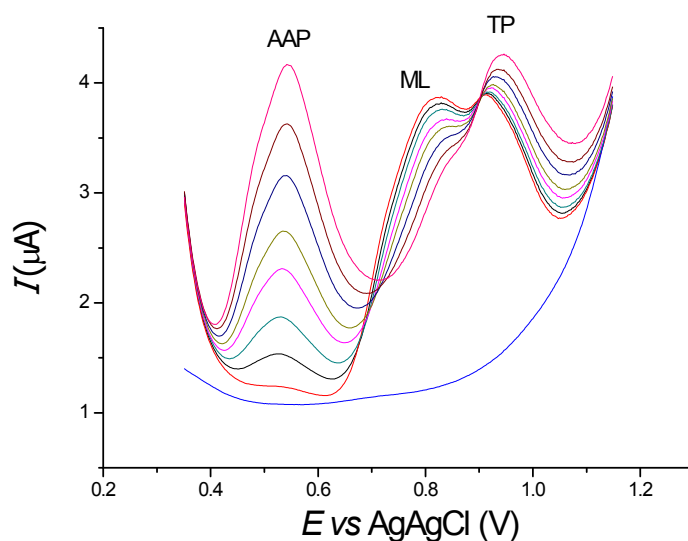

Fig. 4S-A. Differential pulse voltammetry for the simultaneous determination of amitriptyline in the presence of melatonin and tryptophan using the GC/MagNPs/Cdots composite electrode, in 0.1 mol L<sup>-1</sup> BR-buffer at pH 3.0.

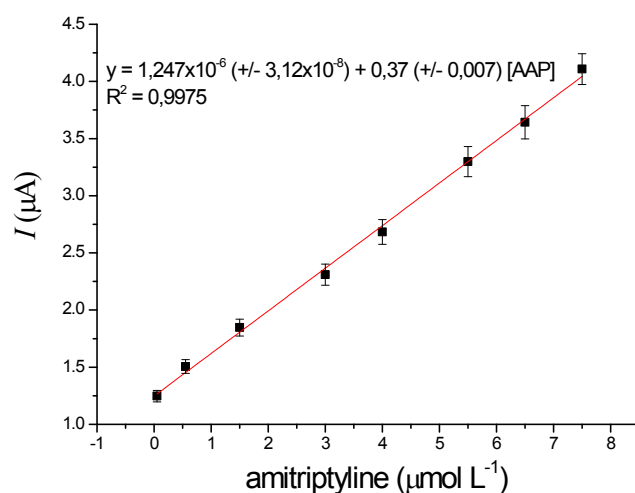

Fig. 4S-B. Analytical curve of amitriptyline (concentration range of (μmol L<sup>-1</sup>): 0,05; 0,55; 1,50; 3,00; 4,00; 5,50; 6,50; 7,50) in the presence of melatonin and tryptophan using the GC/MagNPs/Cdots composite electrode, in 0.1 mol L<sup>-1</sup> BR-buffer at pH 3.0.

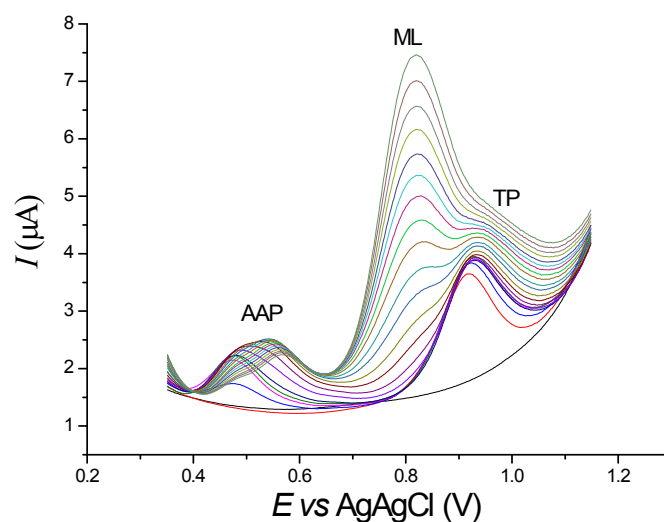

Fig. 5S-A. Differential pulse voltammetry for the simultaneous determination of melatonin in the presence of amitriptyline and tryptophan using the GC/MagNPs/Cdots composite electrode, in 0.1 mol L<sup>-1</sup> BR-buffer at pH 3.0.

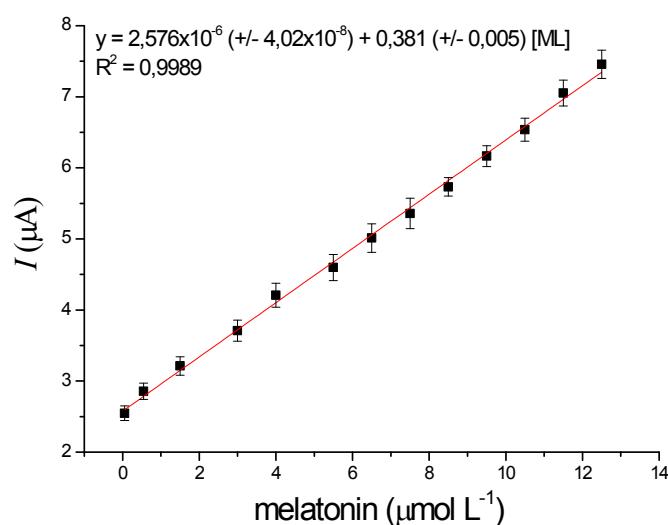

Fig. 5S-B. Analytical curve of melatonin (concentration range of (μmol L<sup>-1</sup>): 0,05; 0,55; 1,50; 3,00; 4,00; 5,50; 6,50; 7,50; 8,50; 9,50; 10,50; 11,50; 12,50) in the presence of amitriptyline and tryptophan using the GC/MagNPs/Cdots composite electrode, in 0.1 mol L<sup>-1</sup> BR-buffer at pH 3.0.

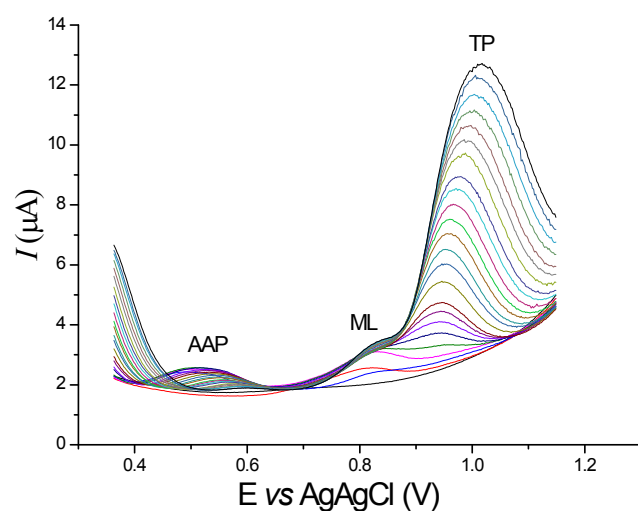

Fig. 6S-A. Differential pulse voltammetry for the simultaneous determination of tryptophan in the presence of amitriptyline and melatonin using the GC/MagNPs/Cdots composite electrode, in 0.1 mol L<sup>-1</sup> BR-buffer at pH 3.0.

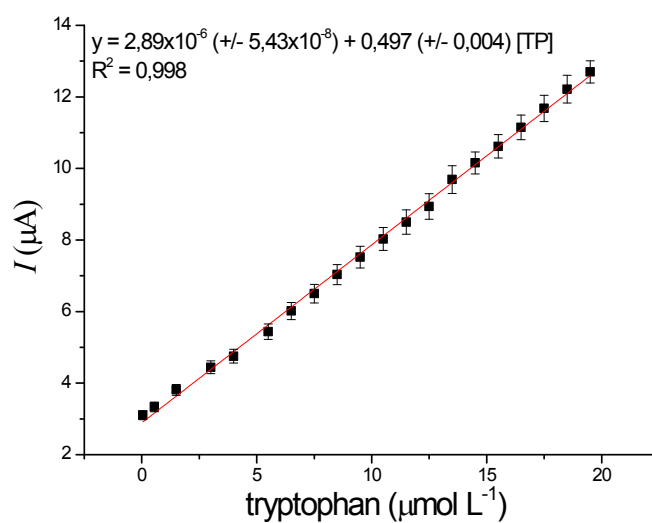

Fig. 6S-B. Analytical curve of tryptophan (concentration range of (µmol L<sup>-1</sup>): 0,05; 0,55; 1,50; 3,00; 4,00; 5,50; 6,50; 7,50; 8,50; 9,50; 10,50; 11,50; 12,50; 13,50; 14,50; 16,50; 17,50; 18,50; 19,50) in the presence of amitriptyline and melatonin using the GC/MagNPs/Cdots composite electrode, in 0.1 mol L<sup>-1</sup> BR-buffer at pH 3.0.

Table 1S. Results obtained from the selectivity studies of possible concomitant interferents in the sample of AMP, ML and TP.

| Concomitant           | Current ( $I_{pa}$ / $\mu A$ ) |                    |                    | Interference* (%) |
|-----------------------|--------------------------------|--------------------|--------------------|-------------------|
|                       | AMP                            | ML                 | TP                 |                   |
| absence               | 4.020                          | 7.220              | 6.590              | -                 |
| ascorbic acid         | 4.044 <sup>a</sup>             | 7.241              | 6.613              | +0.6              |
| uric acid             | 4.052 <sup>b</sup>             | 7.258              | 6.624              | +0.8              |
| dopamine              | 4.056                          | 7.321 <sup>c</sup> | 6.632              | +1.4              |
| estriol               | 4.021                          | 7.229              | 6.603 <sup>d</sup> | +0.2              |
| 17 $\beta$ -estradiol | 4.028                          | 7.234              | 6.610 <sup>e</sup> | +0.3              |

<sup>a</sup> ascorbic acid displayed the highest value of interference (+0.6%) toward AMP. For other analytes the interference was not significant.

<sup>b</sup> uric acid displayed the highest value of interference (+0.8%) toward AMP. For other analytes the interference was not significant.

<sup>c</sup> dopamine displayed the highest value of interference (+1.4%) toward ML. For other analytes the interference was not significant.

<sup>d</sup> estriol displayed the highest value of interference (+0.2%) toward TP. For other analytes the interference was not significant. For other analytes the interference was not significant.

<sup>e</sup> 17 $\beta$ -estradiol displayed the highest value of interference (+0.3%) toward TP. For other analytes the interference was not significant.
